# Supplementary material for: Characterization and Comparison of Convergence Among Cephalotus follicularis Pitcher Plant-Associated Communities With Those of Nepenthes and Sarracenia Found Worldwide
Source: Front Plant Sci. 2022 Jun 6;13:887635. doi: 10.3389/fpls.2022.887635 (PMC9207445; doi:10.3389/fpls.2022.887635)
Supplement: Supplementary file 1 [file Table_1.xlsx]

## Sheet: 16S
16S Top ASVs			SILVA		BLAST
ASV	Number of Sequences	% Relative Abundance	Taxon	Confidence	Taxon	Max Score	Silva and BLAST the same?	Notes
86f1248ee4ea85afd8c5b67cc1b04d4c	4354	8.78957	Burkholderia-Caballeronia-Paraburkholderia	0.999963	Paraburkholderia sp. strain 4B ATCC_43038	457	yes	Burkholderia-Caballeronia-Paraburkholderia all in top 100
00c246b120f5d923130e01c042aef3de	1930	3.89616	Burkholderia-Caballeronia-Paraburkholderia	0.999455	Burkholderia gladioli strain B20001	457	yes	Burkholderia-Caballeronia-Paraburkholderia all in top 100
31581ffc36b7c7398618f72561b9c30e	1771	3.57518	Rhodanobacter	0.906446	Rhodanobacter sp. strain C1NPK_RP_83	457	yes	Rhodanobactor-Dyella-Lutiebactor all in top 100
603f5ea0f1008715e6a3c3c564310ae2	1503	3.03416	Clostridiaceae	0.99908	Clostridium frigidicarnis strain HYN0076	457	yes	Clostridium sp. all in top 100, SILVA listed as unidentified
d59faa85a8825f8ca169ec36eac30d33	1312	2.64858	uncultured Rhodanobacter sp.	0.937368	Rhodanobacter sp. strain 2817	457	yes	Rhodanobactor sp. strain all in top 100
a2c545f5ccf47cb3fa4328911491be03	1270	2.56379	Rhodanobacter	0.999364	Rhodanobacter sp. strain 2793	457	yes	Rhodanobactor-Dyella-Frateuria all in top 100
a894dd1ea1b8f48947a9e9ff688f06cc	1126	2.27309	Chryseobacterium	1	Chryseobacterium sp. strain YA-10	468	yes	Chryseobacterium all in top 100
273a7e473fa4cec691b3915fe9879d4a	1091	2.20244	Talaromyces purpureogenus	0.995854	Penicillium dendriticum (FRR 1885)	409	similar	Penicillium-Talaromyces all in top 85
68084402ba50c5318fb1062026beb58d	922	1.86127	Burkholderia-Caballeronia-Paraburkholderia	0.999961	Paraburkholderia fungorum strain 2723	468	yes	Paraburkholderia all in top 100
46b9e7fb28d034318da22fcca29c7d5f	916	1.84916	Chlamydiales; Simkaniaceae	0.918694	Chlamydiales bacterium CRIB33 16S	375	yes	Chlamydiales-Rhabdochlamydiaceae-Candidatus mixed in top 100
6d9cd2c15c4f412494a5241713e90620	913	1.8431	Acidocella	0.999798	Acidocella facilis	457	yes	Acidocella-Acidiphilium-Acidospheria in top 100
2743823e7602e70cfa467627e69d2774	870	1.7563	Rhizobiaceae; Allorhizobium-Neorhizobium-Pararhizobium-Rhizobium	0.99984	Rhizobium sophorae strain IST6	468	yes	Rhizobium all in top 100
c7c02c07fb28c8730768bb76cafad3fe	861	1.73813	Burkholderia-Caballeronia-Paraburkholderia	0.999543	Caballeronia udeis strain AR 20-93	468	yes	Caballeronia-Burkholderiaceae all in top 100; no Paraburkholderia in top 100
ab041ce1e9b31cab4b15f724613787ed	838	1.6917	Gammaproteobacteria	0.953708	Pseudomonas sp. 5N1-1	346	yes, more resolution	Pseudomonas all in top 100; one Thalassomonas hit in top 100
20a5742fa070fed6d4de150566ef9162	820	1.65536	Burkholderia-Caballeronia-Paraburkholderia	0.99992	Paraburkholderia sp. S-r247	468	yes	Burkholderia-Paraburkholderia all in top 100; one hit as Rhizobium in top 100
d5ec6e3746c3bf504e27b35890e98b50	812	1.63921	Luteibacter	0.977159	Luteibacter rhizovicinus strain LrLB20	468	yes	top 20 100% percent identty w/Luteibacter
e1e43bf6ac8e5acf2a2360fa5762f076	804	1.62306	Dyella	0.830089	Dyella sp. strain AR20-53	468	yes	Dyella-Frateuria-Luteibacter all in top 100
985236e84a4c75a0c1a8e5f342377b51	758	1.5302	Rhodanobacteraceae	1	Fulvimonas sp. strain SSA-1565	468	yes	top 100 all Rhodanobacteriaceae, more resolution to genera: Fulvimonas/Dyella
2e2a6202472df993a738b2130f9cddd0	687	1.38687	Mycobacterium	0.999995	Mycolicibacter minnesotensis JCM 17932	468	yes	Mycolicibacter-Mycobacterium all in top 100
eef6d3c42ab7df7398b35f58e10d7f8d	645	1.30208	Burkholderia-Caballeronia-Paraburkholderia	0.999108	Herbaspirillum sp. H3BS1_pA	468	similar	slightly different from SILVA; Herbaspirillum-Burkholderia-Caballeronia all in top 100

## Sheet: 18S
18S Top ASVs			SILVA		BLAST
ASV	Number of Sequences	% Relative Abundance	Taxon	Confidence	Taxon	Max Score	Silva and BLAST the same?	Notes
b5e221ff357fcf1d4a256019359bc802	3959	9.8679	Aspergillaceae	0.829017	Penicilliopsis clavariiformis	300	yes	Best match is Aspergillaceae
c66a2917c367afa01427476d509bd78c	3109	7.74925	Oscheius tipulae	0.780396	Oscheius dolichura isolate PS330	291	similar	98% support for Oscheius, top 100 hits in Chromadorea
79729afb34ae5f30b1ca833c94d366f4	2573	6.41326	Diptera	0.989238	PREDICTED: Drosophila innubila	296	yes	Drosophila in all 100 top hits. Diptera supported
1d7bcae5a16f8375510a71d8975cdb45	1531	3.81605	Tylenchida	0.996028	Howardula sp. SP-B isolate SP391	261	yes	Tylenchida best supported match
652cf85b4abfec4f1a60234144f213cd	1515	3.77617	Mortierellaceae; Mortierella	0.865713	Zygomycete sp. AM-2008a isolate 317_1	296	no	best match Mucoromycotina
acac442878ea0ee2b1afc7f2a10546c3	1062	2.64706	Mortierellaceae; Mortierella	0.75671	Zygomycete sp. AM-2008a isolate 317_1	274	no	best match Mucoromycotina
bfa44caca71a73f23ff062d3cfacc7f3	1015	2.52991	Mortierellaceae; Mortierella	0.746713	Zygomycete sp. AM-2008a isolate 317_1	279	no	best match Mucoromycotina
33597b1b4c21add32418cf76c1b5415b	897	2.23579	Chlorophyta	0.985744	Chloromonas augustae	279	no	Matching better with Chloromonas than Chlorophyta. Best match with Chlamydomonadaceae
a1c90fb33f018dfa3b509a8cd02f9b7f	885	2.20588	Apicomplexa	0.906675	Apicomplexa sp. 1 KCW-2013	198	yes	Best match phylum Apicomplexa
930c0c06d40f7cc1bd656bccc36b1129	853	2.12612	Apicomplexa	0.956546	Quadruspinospora sp. JMD-2019a	233	yes with more support for class	Best match in phyllum Apicomplexa and Class Conoidasida
c33ad4208439013133747ad0d0ce117a	776	1.9342	Mortierella	0.960798	Mortierella elongata	302	yes	Best match with Mortierella, in Mucoromycotina
f71e1566a20d1ca4c14aef188dd15109	704	1.75474	Araneae	0.818889	Pardosa laura	291	yes	Best match is to the subgroup, Entelegynae
efe1b01808d2a95b9b173ec0f561dab5	689	1.71735	Fungi	0.995485	Penicillium purpurogenum strain KCTC6775	307	yes, more resolution	Best mathces in orders Eurotiales and Onygenales
f4a346c1ae6ae54074dc073240e635e9	665	1.65753	Adinetida	0.951284	Adineta vaga isolate O1	294	yes	Best number of matches within class Bdelloidea
f9a4ec63dc171ac8f108e3d20e0ea272	634	1.58026	Scytomonas saepesedens	0.999715	Scytomonas saepesedens	281	yes	Best match Scytomonadidae
11dcc6ebcdca417576d6a0feaf01a6df	621	1.54786	Tylenchida	0.991079	Howardula sp. SP-B isolate SP391	255	no	best match within Anguininae
18bd7b0f0e35a3cdc1ef2817f79c93f3	549	1.36839	Diptera	0.979168	PREDICTED: Drosophila subobscura	279	yes	All top 100 in Drosophila
367a2e0c7947cd7474e7e50a8f2d4d99	549	1.36839	Eukaryota	0.962927	Physarum pusillum	233	no	Top 100 matches in Myxogastria (plasmodial slime mold) Physariida and Stemonitida
58d7242e45d4681a97a2741bd5030678	495	1.2338	Coccomyxa	0.725912	Pseudococcomyxa simplex	303	yes	best match with Trebouxiaphyaeae, Coccomyxa
752f02a7468ce3c896ddc0390e5c7db0	475	1.18395	Fungi	0.997591	Debaryomyces sp.	302	no	best matches in Saccharomycetales, Debaryomycetaceae
